# Supplementary material
Source: HighWire-hosted journal article supplement (https://erj.ersjournals.com/content/58/4/2101963)
Supplement: inline-supplementary-material-1 [file inline-supplementary-material-1.pdf]

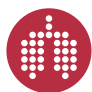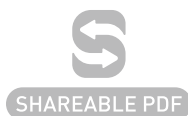

# The search for realistic evidence on the outcomes of obstructive sleep apnoea

Sophia Schiza<sup>1</sup>, Patrick Lévy<sup>2,3</sup>, Miguel Angel Martinez-Garcia<sup>4,5</sup>, Jean-Louis Pepin<sup>2,3</sup>, Anita Simonds<sup>6</sup> and Winfried Randerath<sup>7</sup> 

<sup>1</sup>Sleep Disorders Center, Dept of Respiratory Medicine, Medical School, University of Crete, Heraklion, Greece. <sup>2</sup>Univ. Grenoble Alpes, Inserm, HP2 Laboratory, Grenoble, France. <sup>3</sup>Grenoble University Hospital, Sleep Laboratory, EFCR, Grenoble, France. <sup>4</sup>Pneumology Dept, University and Politechnic La Fe Hospital, Valencia, Spain. <sup>5</sup>CIBERES de enfermedades respiratorias, ISCIII, Madrid, Spain. <sup>6</sup>Royal Brompton & Harefield NHS Foundation Trust, London, UK. <sup>7</sup>Bethanien Hospital, Clinic of Pneumology and Allergology, Center for Sleep Medicine and Respiratory Care, Institute of Pneumology at the University of Cologne, Solingen, Germany.

Corresponding author: Winfried Randerath ([randerath@klinik-bethanien.de](mailto:randerath@klinik-bethanien.de))

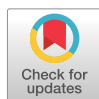

Shareable abstract (@ERSpublications)

**The reported effect of CPAP on cardiovascular outcomes in sleep apnoea should be interpreted with caution and several factors must be considered before definite conclusions can be drawn**  
<https://bit.ly/3LQG4d>

**Cite this article as:** Schiza S, Lévy P, Martinez-Garcia MA, *et al.* The search for realistic evidence on the outcomes of obstructive sleep apnoea. *Eur Respir J* 2021; 58: 2101963 [DOI: 10.1183/13993003.01963-2021].

This single-page version can be shared freely online.

Copyright ©The authors 2021. For reproduction rights and permissions contact [permissions@ersnet.org](mailto:permissions@ersnet.org)

Received: 13 July 2021  
Accepted: 30 July 2021

The burden and societal impact of obstructive sleep apnoea (OSA) needs to be more widely understood to guide health policies and improve value-based care. OSA affects one billion people worldwide, representing a major and still under-recognised health problem. Its prevalence is expected to continue to increase, owing to the obesity epidemic and the increase in life expectancy [1]. OSA has been associated with numerous long-term consequences, including cardiovascular and metabolic disorders, and neuropsychiatric diseases [2–4]. Also, OSA impairs quality of life, cognitive function, and productivity in the workplace, and causes road traffic accidents, resulting in injuries and fatalities [5].
